# Supplementary material
Source: publisher figshare collection journal article supplement (https://gsapubs.figshare.com/articles/dataset/_/22009637)
Supplement: Supplementary file 1 [file 1]

Wu, H., Liu, X.J., Chen, J.W., Li, C., Yang, R., and Jiang, Z.Q., 2023, Tectonomagmatic response to the geometric evolution of slab breakoff in the Paleo-Tethys Ocean: Constraints from Late Triassic granites in the Qiangtang block, northern Tibet: GSA Bulletin, <https://doi.org/10.1130/B36456.1>.

## Supplemental Material

**Table S1.** Zircon isotopic LA-ICP-MS analyses for the granitoid samples.

**Table S2.** Major (wt.%) and trace element (ppm) compositions of the granitoid samples.

**Table S3.** Hf isotopes of zircons of the granitoid samples.

**Table S4.** Summary of age data for the Late Triassic granitic rocks and metamorphic rocks in the Qiangtang block.

**Table S5.** Summary of Major (wt.%) and trace element (ppm) compositions for the Late Triassic granitic rocks in the Qiangtang block.

Table S4. Summary of age data for the Late Triassic granitic rocks and metamorphic rocks in the Qiangtang block.

| No.                                                    | Sample  | Lithology                 | Age (Ma)  | Dating method            | Location           | References         |
|--------------------------------------------------------|---------|---------------------------|-----------|--------------------------|--------------------|--------------------|
| <b>Age data for granitoids from Southern Qiangtang</b> |         |                           |           |                          |                    |                    |
| 1                                                      | R12T8   | Granodiorite              | 211.0±1.8 | LA-ICP-MS<br>Zircon U-Pb | Riwanchaka         | Chen et al., 2014  |
| 2                                                      | 08-06T  | Granodiorite              | 225.1±2.4 | LA-ICP-MS<br>Zircon U-Pb | Guoganjianian      | Hu et al., 2010a   |
| 3                                                      | PM501t1 | Granitic gneiss           | 209.1±2.8 | LA-ICP-MS<br>Zircon U-Pb | Wugong<br>Mountain | Hu et al., 2010b   |
| 4                                                      | SH-04   | Granodiorite              | 220.8±1.4 | MC-ICP-MS<br>Zircon U-Pb | Shuanghu           | Li et al., 2015a   |
| 5                                                      | SH-43   | Granite                   | 212.0±1.5 | MC-ICP-MS<br>Zircon U-Pb | Shuanghu           | Li et al., 2015a   |
| 6                                                      | SH-29-A | Granodiorite              | 222.2±1.3 | MC-ICP-MS<br>Zircon U-Pb | Shuanghu           | Li et al., 2015a   |
| 7                                                      | YJ-2    | Granodiorite              | 220.3±1.5 | MC-ICP-MS<br>Zircon U-Pb | Shuanghu           | Li et al., 2015a   |
| 8                                                      | YJ-3    | Granodiorite              | 221.2±1.5 | MC-ICP-MS<br>Zircon U-Pb | Shuanghu           | Li et al., 2015a   |
| 9                                                      | BH-4    | Granodiorite              | 212.5±1.1 | MC-ICP-MS<br>Zircon U-Pb | Rongma             | Li et al., 2015a   |
| 10                                                     | BH-6    | Granite                   | 209.7±1.3 | MC-ICP-MS<br>Zircon U-Pb | Rongma             | Li et al., 2015a   |
| 11                                                     | SH-29-B | Diorite<br>enclave        | 221.0±1.2 | MC-ICP-MS<br>Zircon U-Pb | Shuanghu           | Li et al., 2015a   |
| 12                                                     | GANG-1  | Granite                   | 214.4±4.0 | LA-ICP-MS<br>Zircon U-Pb | Gangtang Co        | Li et al., 2015b   |
| 13                                                     | GANG-2  | Granite                   | 222.2±6.6 | LA-ICP-MS<br>Zircon U-Pb | Gangtang Co        | Li et al., 2015b   |
| 14                                                     | 16R2-2  | Granite                   | 213.8±1.3 | LA-ICP-MS<br>Zircon U-Pb | Baicuo             | Li et al., 2020    |
| 15                                                     | 16R2-3  | Granite                   | 210.0±2.1 | LA-ICP-MS<br>Zircon U-Pb | Baicuo             | Li et al., 2020    |
| 16                                                     | 16R2-4  | Granite                   | 208.1±1.4 | LA-ICP-MS<br>Zircon U-Pb | Baicuo             | Li et al., 2020    |
| 17                                                     | D1160   | Granodiorite              | 217.0±1.5 | LA-ICP-MS<br>Zircon U-Pb | Naru               | Liu et al., 2015   |
| 18                                                     | D1161   | Granodiorite              | 215.1±1.8 | LA-ICP-MS<br>Zircon U-Pb | Naru               | Liu et al., 2015   |
| 19                                                     | 11SGH-2 | Biotite<br>adamellite     | 207.8±2.9 | LA-ICP-MS<br>Zircon U-Pb | Sangehu            | Liu et al., 2016   |
| 20                                                     | 11SGH-9 | K-Feldspar<br>granite     | 211.6±3.8 | LA-ICP-MS<br>Zircon U-Pb | Sangehu            | Liu et al., 2016   |
| 21                                                     | 11SGH-6 | Enclave                   | 212.4±3.1 | LA-ICP-MS<br>Zircon U-Pb | Sangehu            | Liu et al., 2016   |
| 22                                                     | R14T3   | Granodiorite              | 222.0±1.0 | LA-ICP-MS<br>Zircon U-Pb | Riwanchaka         | Wu et al., 2016    |
| 23                                                     | R3T4    | Granodiorite              | 236.3±0.9 | LA-ICP-MS<br>Zircon U-Pb | Riwanchaka         | Wu et al., 2019    |
| 24                                                     | R4T4    | Granodiorite              | 230.1±1.9 | LA-ICP-MS<br>Zircon U-Pb | Riwanchaka         | Wu et al., 2019    |
| 25                                                     | 32TW1-2 | Granodiorite              | 205.4±2.9 | LA-ICP-MS<br>Zircon U-Pb | Shuanghu           | Xie et al., 2022   |
| 26                                                     | 32TW3-1 | Granodiorite              | 209.2±2.2 | LA-ICP-MS<br>Zircon U-Pb | Shuanghu           | Xie et al., 2022   |
| 27                                                     | 32TW2   | Microgranular<br>enclaves | 207.1±2.2 | LA-ICP-MS<br>Zircon U-Pb | Shuanghu           | Xie et al., 2022   |
| 28                                                     | 32TW4   | Microgranular<br>enclaves | 206.6±3.8 | LA-ICP-MS<br>Zircon U-Pb | Shuanghu           | Xie et al., 2022   |
| 29                                                     | TL01    | Monzonitic<br>granite     | 211.0±4.0 | LA-ICP-MS<br>Zircon U-Pb | Xiangtaohu         | Zhang et al., 2014 |
| 30                                                     | TL04    | Monzonitic<br>granite     | 213.0±2.0 | LA-ICP-MS<br>Zircon U-Pb | Xiangtaohu         | Zhang et al., 2014 |
| 31                                                     | 1453-1  | Granodiorite<br>porphyry  | 212.6±4.9 | LA-ICP-MS<br>Zircon U-Pb | Jiangai            | Zhao et al., 2018  |

|                                                        |           |                  |           |                          |                |                    |
|--------------------------------------------------------|-----------|------------------|-----------|--------------------------|----------------|--------------------|
| 32                                                     | 1460-1    | Biotite granite  | 215.4±2.7 | LA-ICP-MS<br>Zircon U-Pb | Jiagai         | Zhao et al., 2018  |
| 33                                                     | 1467-1    | Biotite granite  | 210.4±2.0 | LA-ICP-MS<br>Zircon U-Pb | Jiagai         | Zhao et al., 2018  |
| 34                                                     | R13T14    | Monzogranite     | 225.8±1.7 | LA-ICP-MS<br>Zircon U-Pb | Changliangshan | This study         |
| 35                                                     | R12T1     | Granodiorite     | 215.0±1.2 | LA-ICP-MS<br>Zircon U-Pb | Changliangshan | This study         |
| 36                                                     | R3T14     | Granodiorite     | 214.4±2.4 | LA-ICP-MS<br>Zircon U-Pb | Changliangshan | This study         |
| <b>Age data for granitoids from Northern Qiangtang</b> |           |                  |           |                          |                |                    |
| 37                                                     | T15-68-1  | Granitoid        | 208.0±3.9 | LA-ICP-MS<br>Zircon U-Pb | Leiwuqi        | Chen et al., 2018  |
| 38                                                     | T15-68-2  | Granitoid        | 210.0±1.2 | LA-ICP-MS<br>Zircon U-Pb | Leiwuqi        | Chen et al., 2018  |
| 39                                                     | T15-58-1  | Granitoid        | 211.2±1.2 | LA-ICP-MS<br>Zircon U-Pb | Leiwuqi        | Chen et al., 2018  |
| 40                                                     | T15-60-2  | Granitoid        | 210.7±3.7 | LA-ICP-MS<br>Zircon U-Pb | Leiwuqi        | Chen et al., 2018  |
| 41                                                     | T15-68-10 | Granitoid        | 213.2±0.8 | LA-ICP-MS<br>Zircon U-Pb | Leiwuqi        | Chen et al., 2018  |
| 42                                                     | T15-69-2  | Granitoid        | 208.0±1.8 | LA-ICP-MS<br>Zircon U-Pb | Leiwuqi        | Chen et al., 2018  |
| 43                                                     | T15-69-4  | Granitoid        | 210.5±2.3 | LA-ICP-MS<br>Zircon U-Pb | Leiwuqi        | Chen et al., 2018  |
| 44                                                     | T15-73-1  | Granitoid        | 207.5±1.7 | LA-ICP-MS<br>Zircon U-Pb | Leiwuqi        | Chen et al., 2018  |
| 45                                                     | D1185N    | Monzogranite     | 231.0±1.4 | LA-ICP-MS<br>Zircon U-Pb | Xiamari        | Guan et al., 2016  |
| 46                                                     | D1186N    | Monzogranite     | 227.2±1.6 | LA-ICP-MS<br>Zircon U-Pb | Xiamari        | Guan et al., 2016  |
| 47                                                     | AD1604-U1 | Granite          | 229.6±2.3 | LA-ICP-MS<br>Zircon U-Pb | Cairi          | He et al., 2022    |
| 48                                                     | 15ZB174-1 | Granite          | 217.0±2.0 | SIMS<br>Zircon U-Pb      | Shuanghu       | Jiang et al., 2021 |
| 49                                                     | GR-6      | Granitoid        | 224.2±5.5 | LA-ICP-MS<br>Zircon U-Pb | Geri           | Lu et al., 2017    |
| 50                                                     | GR-17     | Granitoid        | 223.4±4.9 | LA-ICP-MS<br>Zircon U-Pb | Geri           | Lu et al., 2017    |
| 51                                                     | DM-10     | Granitoid        | 227.9±2.2 | LA-ICP-MS<br>Zircon U-Pb | Dangmujiang    | Lu et al., 2017    |
| 52                                                     | TK-9      | Granite-porphyry | 221.3±1.2 | LA-ICP-MS<br>Zircon U-Pb | Tanggula Range | Lu et al., 2019    |
| 53                                                     | TK-11     | Granite-porphyry | 221.0±3.3 | LA-ICP-MS<br>Zircon U-Pb | Tanggula Range | Lu et al., 2019    |
| 54                                                     | 11ST-60F  | Granite          | 220.3±0.7 | LA-ICP-MS<br>Zircon U-Pb | Dongdashan     | Peng et al., 2015  |
| 55                                                     | 10TG06    | Syenogranite     | 235.1±1.4 | LA-ICP-MS<br>Zircon U-Pb | Tanggula       | Song et al., 2022  |
| 56                                                     | 10TG21    | Syenogranite     | 235.3±1.6 | LA-ICP-MS<br>Zircon U-Pb | Tanggula       | Song et al., 2022  |
| 57                                                     | 10TG03    | Syenogranite     | 233.9±1.2 | LA-ICP-MS<br>Zircon U-Pb | Tanggula       | Song et al., 2022  |
| 58                                                     | 10TG05    | Syenogranite     | 233.1±1.9 | LA-ICP-MS<br>Zircon U-Pb | Tanggula       | Song et al., 2022  |
| 59                                                     | 10TG17    | Syenogranite     | 232.9±1.9 | LA-ICP-MS<br>Zircon U-Pb | Tanggula       | Song et al., 2022  |
| 60                                                     | 10TG14    | Syenogranite     | 230.1±1.2 | LA-ICP-MS<br>Zircon U-Pb | Tanggula       | Song et al., 2022  |
| 61                                                     | 10TG23    | Syenogranite     | 230.1±2.9 | LA-ICP-MS<br>Zircon U-Pb | Tanggula       | Song et al., 2022  |
| 62                                                     | 10TG09    | Monzogranite     | 230.1±1.0 | LA-ICP-MS<br>Zircon U-Pb | Tanggula       | Song et al., 2022  |
| 63                                                     | 10TG22    | Syenogranite     | 225.9±2.2 | LA-ICP-MS<br>Zircon U-Pb | Tanggula       | Song et al., 2022  |
| 64                                                     | JR3       | Biotite granite  | 219.1±1.7 | LA-ICP-MS<br>Zircon U-Pb | Jitang         | Tao et al., 2014   |

|                                                                     |            |                               |           |                          |                 |                      |
|---------------------------------------------------------------------|------------|-------------------------------|-----------|--------------------------|-----------------|----------------------|
| 65                                                                  | GZ114-8    | Diorite                       | 219.0±2.0 | SIMS<br>Zircon U-Pb      | Baohu           | Wang et al., 2021    |
| 66                                                                  | GZ114-2    | Diorite                       | 220.0±2.0 | SIMS<br>Zircon U-Pb      | Baohu           | Wang et al., 2021    |
| 67                                                                  | GZ111-3    | Diorite                       | 222.0±2.0 | SIMS<br>Zircon U-Pb      | Baohu           | Wang et al., 2021    |
| 68                                                                  | BH0701     | Diorite                       | 223.0±2.0 | LA-ICP-MS<br>Zircon U-Pb | Baohu           | Zhai et al., 2013    |
| <b>Age for metamorphic rocks from the central Qiangtang terrane</b> |            |                               |           |                          |                 |                      |
| 69                                                                  | P02-38K    | Grt-Phg schist                | 218.8±1.5 | Phg Ar-Ar                | Pianshishan     | Dong et al., 2009    |
| 70                                                                  | 97-6-9-4a  | Epidote<br>amphibolites       | 207.8±1.1 | Amp Ar-Ar                | Shuanghu        | Kapp et al., 2003    |
| 71                                                                  | 97-6-13-3b | Epidote<br>amphibolites       | 209.5±1.0 | Amp Ar-Ar                | Shuanghu        | Kapp et al., 2003    |
| 72                                                                  | 97-6-16-4a | Epidote<br>amphibolites       | 212.7±1.1 | Amp Ar-Ar                | Shuanghu        | Kapp et al., 2003    |
| 73                                                                  | 5-31-99-1c | Blueschist                    | 221.4±0.3 | Phg Ar-Ar                | Rongma          | Kapp et al., 2003    |
| 74                                                                  | 6-30-99-2m | Blueschist                    | 221.8±0.1 | Phg Ar-Ar                | Rongma          | Kapp et al., 2003    |
| 75                                                                  | P22-05-02  | Eclogite                      | 219.3±1.5 | Phg Ar-Ar                | Guoganjianian   | Li et al., 2006      |
| 76                                                                  | P22-05-03  | Grt-Phg schist                | 217.2±1.8 | Phg Ar-Ar                | Guoganjianian   | Li et al., 2006      |
| 77                                                                  |            | Blueschist                    | 222.5±3.7 | Crs Ar-Ar                | Guoganjianian   | Li, 1997             |
| 78                                                                  | P22-16-TW1 | Qtz-Phg schist                | 219.1±1.4 | Phg Ar-Ar                | Lanling         | Liang et al., 2012   |
| 79                                                                  | P22-16-TW3 | Qtz-Phg schist                | 211.9±1.2 | Phg Ar-Ar                | Lanling         | Liang et al., 2012   |
| 80                                                                  | 6-30-99-2D | Grt blueschist                | 223.4±4.5 | Grt-Gln Lu-Hf            | Rongma          | Pullen et al., 2008  |
| 81                                                                  | 06AQ183    | Gar-Mca schist                | 228.1±1.3 | Wmca Ar-Ar               | Gomoco          | Pullen et al., 2011  |
| 82                                                                  | 06AQ47     | Qtz-Mca schist                | 209.6±1.2 | Wmca Ar-Ar               | Gomoco          | Pullen et al., 2011  |
| 83                                                                  | 06AQ182B   | Eclogite-facies<br>metagabbro | 231.0±3.2 | Amp Ar-Ar                | Gomoco          | Pullen et al., 2011  |
| 84                                                                  | 06AQ173    | Grt blueschist                | 194.0±5.1 | Amp Ar-Ar                | Pianshishan     | Pullen et al., 2011  |
| 85                                                                  | S-13       | Blueschist                    | 241.7±2.0 | Gln Ar-Ar                | Hongjishan      | Tang and Zhang, 2012 |
| 86                                                                  | S-7        | Blueschist                    | 207.3±2.5 | Phg Ar-Ar                | Hongjishan      | Tang and Zhang, 2014 |
| 87                                                                  |            | Greenschist                   | 230.0±1.0 | Phg Ar-Ar                | Northern Baqing | Wang et al., 2006    |
| 88                                                                  | PM011-(5)  | Phengite schist               | 202.6±2.7 | Amp Ar-Ar                | Mayer Kangri    | Wang et al., 2018    |
| 89                                                                  | PM011-(5)  | Phengite schist               | 192.9±2.0 | Amp Ar-Ar                | Mayer Kangri    | Wang et al., 2018    |
| 90                                                                  | PM011-(3)  | Phengite schist               | 196.8±2.1 | Amp Ar-Ar                | Mayer Kangri    | Wang et al., 2018    |
| 91                                                                  | PM011-(5)  | Phengite schist               | 242.4±2.3 | Amp Ar-Ar                | Mayer Kangri    | Wang et al., 2018    |
| 92                                                                  | PM011-(3)  | Phengite schist               | 241.2±2.3 | Amp Ar-Ar                | Mayer Kangri    | Wang et al., 2018    |
| 93                                                                  | 7-19-DF1   | Gar-Phg-Qtz<br>schist         | 224.2±1.5 | Phg Ar-Ar                | Yadan           | Wang et al., 2019    |
| 94                                                                  | 8-15-7DF1  | Gar-Phg-Qtz<br>schist         | 223.9±1.5 | Phg Ar-Ar                | Yadan           | Wang et al., 2019    |
| 95                                                                  | Gt0609     | Grt blueschist                | 227.0±4.0 | Gln Ar-Ar                | Rongma          | Zhai et al., 2009    |
| 96                                                                  | P8         | Blueschist                    | 215.0±2.0 | Phg Ar-Ar                | Rongma          | Zhai et al., 2009    |
| 97                                                                  | GMC0701    | Eclogite                      | 219.5±1.7 | Phg Ar-Ar                | Gangmaco        | Zhai et al., 2011    |
| 98                                                                  | E0635      | Eclogite                      | 214.1±1.8 | Phg Ar-Ar                | Pianshishan     | Zhai et al., 2011    |
| 99                                                                  | E0636      | Grt-Phg schist                | 223.2±1.7 | Phg Ar-Ar                | Pianshishan     | Zhai et al., 2011    |
| 100                                                                 | 08-12T     | Eclogite                      | 213.9±1.2 | Wmca Ar-Ar               | Pianshishan     | Zhang et al., 2010   |
| 101                                                                 | 08-11T     | Garnet-mica schist            | 213.2±1.3 | Wmca Ar-Ar               | Pianshishan     | Zhang et al., 2010   |
| 102                                                                 | 08-07T     | Garnet-mica schist            | 242.3±1.5 | Wmca Ar-Ar               | Guoganjianian   | Zhang et al., 2010   |
| 103                                                                 | D4003N1    | Blueschist                    | 209.0±4.0 | Gln Ar-Ar                | Caiduochaka     | Zhu et al., 2010     |

Abbreviations: Mca=Mica; Gar=Garnet; Wmca=white mica; Crs=crossite, Gln=glaucoophane, Grt=garnet, Phg=phengite; Qtz=Quartz; Zr=Zircon; Amp=Amphibole

## References

Chen, J.W., Li, C., Hu, P.Y., Xie, C.M., Peng, H., and Jiang, Q.Y., 2014, LA-ICP-MS zircon U-Pb age and

- geochemical characteristics of the granodiorite in the Riwanchaka area, central Qiangtang. *Geological Bulletin of China*, v. 33, no. 11, p. 1750–1758 (in Chinese with English abstract).
- Chen, Y., Zhang, Z., Tian, Z., Dong, X., Ding, H., Mu, H., Kang, D., and Li, Y., 2018, Early Mesozoic magmatism and tectonic evolution of east-central Tibet. *International Journal of Earth Sciences*, v. 107, p. 2767–2784.
- Dong, Y.S., Li, C., Shi, J.R., and Wang, S.Y., 2009, Retrograde metamorphism and tectonic emplacement of high pressure metamorphic belt in central Qiangtang Tibet. *Acta Petrological Sinica*, v. 25, no. 9, p. 2303–2309 (in Chinese with English abstract).
- Guan, J.L., Geng, Q.R., Peng, Z.M., Zhang, Z., Wang, G.Z., and Chen, Y.Y., 2016, Petrology, Petrochemistry and Zircon U-Pb Dating and Hf Isotope Features of Xiamari Granites in Tanggula Magmatic Belt, Qinghai-Tibet Plateau. *Acta Geologica Sinica*, v. 90, no. 2, p. 304–333 (in Chinese with English abstract).
- He, H., Li, Y., Wang, T., Xiao, S., Wang, Z., Chen, L., Feng, Z., Han, S., Liu, S., Zhang, Y., and Tang, Z., 2022, Late Triassic granites (ca. 230 Ma) from Cairi area in eastern Qiangtang subterrane, central Tibet: Product of a mid-oceanic ridge subduction. *Geological Journal*, v. 57, p. 150–165.
- Hu, P.Y., Li, C., Jie, C.M., Wang, M., Li, J., and Zhong, L.X., 2010a, Zircon U-Pb dating and Hf isotope compositions of granodiorite from the Guoganjianian mountain area, Central Qiangtang, northern Tibet, China. *Northwest Geology*, v. 47, p. 52–60 (in Chinese with English abstract).
- Hu, P.Y., Li, C., Su, L., Li, C.B., and Yu, H., 2010b, Zircon U-Pb dating of granitic gneiss in Wugong Mountain area, Central Qiangtang, Qinghai-Tibet Plateau: Age records of PanAfrican movement and Indo-China movement. *Geology in China*, v. 37, p. 1050–1061 (in Chinese with English abstract).
- Jiang, Q., Dan, W., Wang, Q., Zhang, X., and Tang, G., 2021, Neoproterozoic Basement Information Revealed in the Triassic Granites in the Northern Qiangtang, Tibetan Plateau: Constraints from Zircon SIMS U-Pb Age and Hf-O Isotopes. *Geotectonica et Metallogenia*, v. 45, no. 2, p. 389–400 (in Chinese with English abstract).
- Kapp, P., Yin, A., Manning, C.E., Harrison, T. M., Taylor, M. H., and Ding, L., 2003, Tectonic evolution of the early Mesozoic blueschist-bearing Qiangtang metamorphic belt, central Tibet. *Tectonics*, v. 22, 1043.
- Li, C., Zhai, Q.G., Dong, Y.S., and Huang, X.P., 2006, Discovery of eclogite in central Qiangtang, Qinghai-Xizang Plateau and the geological significance. *Chinese Science Bulletin*, 51, 70–74 (in Chinese with English abstract).
- Li, C., 1997,  $^{40}\text{Ar}/^{39}\text{Ar}$  age and its geological significance of crossite in blueschist in central Qiangtang, Tibet. *Journal of Changchun University of Earth Sciences*, v. 42, p. 448 (in Chinese).
- Li, G.M., Li, J.X., Zhao, J.X., Qin, K.Z., Cao, M.J., and Evans, N.J., 2015a, Petrogenesis and tectonic setting of Triassic granitoids in the Qiangtang terrane, central Tibet: Evidence from U–Pb ages, petrochemistry and Sr–Nd–Hf isotopes. *Journal of Asian Earth Sciences*, v. 105, p. 443–455.
- Li, J.C., Zhao, Z.B., Zheng, Y.L., Yuan, G.L., Liang, X., Wang, G.H., and Liu, X., 2015b, The magmatite evidences in southern Qiangtang for Paleo-Tethys Ocean subducting collision: Gangtang-Co granites in Rongma, Tibet. *Acta Petrologica Sinica*, v. 31, p. 2078–2088 (in Chinese with English abstract).
- Li, X., Wan, Y., and Wang, J., 2020, Petrogeochemical characteristics, zircon U-Pb ages and Hf isotopic composition of Baicuo granites in central Qiangtang Basin, and its tectonic significance. *Geological Review*, v. 66, no. 5, p. 1172–1185 (in Chinese with English abstract).
- Liang, X., Wang, G., Yuan, G., and Liu, Y., 2012, Structural sequence and geochronology of the Qomo Ri accretionary complex, Central Qiangtang, Tibet: Implications for the Late Triassic subduction of the Paleo-Tethys Ocean. *Gondwana Research*, v. 22, p. 470–481.
- Liu, B., Peng, Z., Geng, Q., Zhang, Z., and Guan, J., 2015, LA-ICP-MS zircon U-Pb ages and Geochemical features of the granodiorite in Naru area of Shuanghu, Tibet. *Geological Bulletin of China*, v. 34, no. 2/3, p. 283–291 (in Chinese with English abstract).
- Liu, H., Wang, B.D., Ma, L., Gao, R., Chen, L., Li, X.B., and Wang, L.Q., 2016, Late Triassic syn-exhumation

- magmatism in central Qiangtang, Tibet: Evidence from the Sangehu adakitic rocks. *Journal of Asian Earth Sciences*, v. 132, p. 9–24.
- Lu, L., Qin, Y., Li, Z.F., Yan, L.L., Jin, X., and Zhang, K.J., 2019, Diachronous closure of the Shuanghu Paleo-Tethys Ocean: Constraints from the Late Triassic Tanggula arc-related volcanism in the East Qiangtang subterranean, Central Tibet. *Lithos*, v. 328–329, p. 182–199.
- Lu, L., Zhang, K.J., Yan, L.L., Jin, X., and Zhang, Y.X., 2017, Was Late Triassic Tanggula granitoid (central Tibet, western China) a product of melting of underthrust Songpan-Ganzi flysch sediments?. *Tectonics*, v. 36, p. 902–928.
- Peng, T.P., Zhao, G.C., Fan, W.M., Peng, B.X., and Mao, Y.S., 2015, Late Triassic granitic magmatism in the Eastern Qiangtang, Eastern Tibetan Plateau: Geochronology, petrogenesis and implications for the tectonic evolution of the Paleo-Tethys. *Gondwana Research*, v. 27, p. 1494–1508.
- Pullen, A., Kapp, P., Gehrels, G.E., Ding, L., and Zhang, Q., 2011, Metamorphic rocks in central Tibet: Lateral variations and implications for crustal structure. *Geological Society of America Bulletin*, 123(3–4), 585–600.
- Pullen, A., Kapp, P., Gehrels, G.E., Vervoort, J.D., and Ding, L. (2008). Triassic continental subduction in central Tibet and Mediterranean-style closure of the Paleo-Tethys Ocean. *Geology*, v. 36, p. 351–354.
- Song, S.W., Zhu, D.C., Wang, Q., Cawood, P.A., Zhan, Q.Y., Li, S.M., Zhang, L.L., and Zhao, Z.D., 2021, Generation of syn-collisional S-type granites in collision zones: An example from the Late Triassic Tanggula Batholith in northern Tibet: *Gondwana Research*, v. 104, p. 185–198.
- Tang, X.C., and Zhang, K.J., 2012,  $^{40}\text{Ar}$ - $^{39}\text{Ar}$  Geochronology and Tectonic implications of the Blueschist from Northwestern Qiangtang, Northern Tibet, Western China. *Acta Geologica Sinica (English Edition)*, v. 86, p. 1471–1478.
- Tang, X.C., and Zhang, K.J., 2014, Lawsonite- and glaucophane-bearing blueschists from NW Qiangtang, northern Tibet, China: mineralogy, geochemistry, geochronology, and tectonic implications. *International Geology Review*, v. 56, p. 150–166.
- Tao, Y., Bi, X.W., Li, C.S., Hu, R.Z., Li, Y.B., and Liao, M.Y., 2014, Geochronology, petrogenesis and tectonic significance of the Jitang granitic pluton in eastern Tibet, SW China. *Lithos*, v. 184–187, p. 314–323.
- Wang, G.H., Jia, J.C., Wan, Y.P., Zhang, W.J., Zhou, Z.G., Li, Q.S., and Yang, G.D., 2006, Forming and tectonic significance of the Youxi tectono-schistose formation, north Baqen county, eastern Tibet. *Earth Science Frontiers*, v. 13, p. 180–187 (in Chinese with English abstract).
- Wang, Q., Wang, G.H., Fang, Z.X., Wang, H., Chen, X., Zheng, Y.L., Fan, Z.Z., and Gao, X., 2019, Geochronology, geochemistry and tectonic significance of high-pressure metamorphic rocks from Yadan area in Central Qiangtang, Tibet. *Acta Petrologica Sinica*, v. 35, no. 3, p. 775–798 (in Chinese with English abstract).
- Wang, J., Dan, W., Wang, Q., and Tang, G.J., 2021, High-Mg# Adakitic Rocks Formed by Lowercrustal Magma Differentiation: Mineralogical and Geochemical Evidence from Garnet-bearing Diorite Porphyries in Central Tibet. *Journal of Petrology*, v. 62, ega099.
- Wang, Y., Liang, X., Wang, G., Yuan, G., and Bons, P.D., 2018, Mayer Kangri metamorphic complexes in Central Qiangtang (Tibet, western China): implications for the Triassic–early Jurassic tectonics associated with the Paleo-Tethys Ocean. *International Journal of Earth Sciences*, v. 107, p. 757–776.
- Wu, H., Li, C., Chen, J., and Xie, C.M., 2016, Late Triassic tectonic framework and evolution of Central Qiangtang, Tibet, SW China. *Lithosphere*, v. 8, p. 141–149.
- Xie, L., Lu, R., Huang, Y., Liu, K., and Nan, G., 2022, Petrogenesis and geodynamic significance of Late Triassic mafic microgranular enclaves and its host granodiorite in the Shuanghu area, central Qiangtang. *Geological Journal*, 57, 2686–2711.
- Zhai, Q.G., Li, C., Wang, J., Chen, W., and Zhang, Y. (2009). Petrology, mineralogy and  $^{40}\text{Ar}/^{39}\text{Ar}$  chronology for

- Rongma blueschist from Central Qiangtang, northern Tibet. *Acta Petrologica Sinica*, v. 25, p. 2281–2288 (in Chinese with English abstract).
- Zhai, Q.G., Jahn, B.M., Su, L., Wang, J., Mo, X.X., Lee, H.Y., Wang, K.L., and Tang, S., 2013, Triassic arc magmatism in the Qiangtang area, northern Tibet: Zircon U–Pb ages, geochemical and Sr–Nd–Hf isotopic characteristics, and tectonic implications. *Journal of Asian Earth Sciences*, v. 63, p. 162–178.
- Zhai, Q.G., Zhang, R.Y., Jahn, B.M., Li, C., Song, S.G., and Wang, J., 2011, Triassic eclogites from central Qiangtang, northern Tibet, China: Petrology, geochronology and metamorphic P–T, path. *Lithos*, v. 125, no. 1–2, p. 173–189.
- Zhang, X.Z., Dong, Y.S., Li, C., Deng, M.R., Zhang, L., and Xu, W., 2014, Tectonic setting and petrogenesis mechanism of Late Triassic magmatism in Central Qiangtang, Tibetan Plateau: Take the Xiangtaohu pluton in Hongjishan region as an example. *Acta Petrologica Sinica*, v. 30, p. 547–564 (in Chinese with English abstract).
- Zhao, Z., Lu, L., Wu, Z., Yu, J., and Wu, Y., 2018, Characteristics of the Late Triassic Jiangai Granite Mass and the Slab Break-Off in Central Qiangtang, Tibet. *Earth Science*, v. 43, p. 225–242 (in Chinese with English abstract).
- Zhu, T.X., Zhang, Q.Y., Feng, X.T., Dong, H., Yu, Y.S., and Li, H.R., 2010,  $^{40}\text{Ar}/^{39}\text{Ar}$  isotopic dating of the glaucophane in Caiduo Caka, Central Qiangtang area, northern Tibet, China, and its geological significance. *Acta Geologica Sinica*, v. 84, p. 1448–1456 (in Chinese with English abstract).
